# Supplementary material for: Chiral palladium bis(phosphite) PCP-pincer complexes via ligand C–H activation
Source: Royal Society of Chemistry journal article supplement (doi:10.1039/b609704a), 2006-01-01
Supplement: b609704a.pdf [file b609704a.pdf]

Supplementary Material (ESI) for Chemical Communications

This journal is (c) The Royal Society of Chemistry 2006

## **Chiral palladium bis(phosphite) *PCP*-pincer complexes *via* ligand C-H activation**

R. Angharad Baber, Robin B. Bedford,\* Michael Betham, Michael E. Blake, Simon J. Coles, Mairi F. Haddow, Michael B. Hursthouse, A. Guy Orpen, Lukasz T. Pilarski, Paul G. Pringle\* and Richard L. Wingad

### **Electronic Supplementary Information**

**Synthesis of ligand 4b.** A mixture of **6** (1.50 g, 6.76 mmol) and 4-chlorodinaphtho[2,1-d:1',2'-f][1,3,2]dioxaphosphepine (4.74 g, 13.5 mmol) in toluene (60 mL) at -40 °C was treated drop-wise with NEt<sub>3</sub> (3.0 mL, 21.4 mmol) in toluene (20 mL). The mixture was allowed to warm to room temperature overnight, then filtered and the solvent was removed under vacuum to give **4b** as a colourless solid (6.37 g, 94 %). <sup>1</sup>H NMR (300 MHz; CDCl<sub>3</sub>): 1.30 (18H, s, <sup>t</sup>Bu), 7.02-7.22 (8H, m, ArH), 7.25-7.40 (6H, m, ArH), 7.52 (2H, d, *J* = 9 Hz, ArH), 7.49 (2H, d, *J* = 9 Hz, ArH), 7.74 (2H, d, *J* = 9 Hz, ArH), 7.78 (2H, d, *J* = 8 Hz, ArH), 7.82 (2H, d, *J* = 9 Hz, ArH), 7.86 (2H, d, *J* = 9 Hz, ArH); <sup>31</sup>P NMR (121 MHz; CDCl<sub>3</sub>): 144.6 (s). Anal. calcd for C<sub>54</sub>H<sub>44</sub>O<sub>6</sub>P<sub>2</sub>: C, 76.23; H, 5.21. Found: C, 76.01; H, 5.54.

**Synthesis of 7.** A mixture of **6** (5.0 g, 22.5 mmol) and PCl<sub>3</sub> (15.0 mL, 172 mmol) in toluene (80 mL) at -40 °C was treated drop-wise with NEt<sub>3</sub> (25.0 mL, 180 mmol) in toluene (20 mL). The reaction was allowed to warm to room temperature overnight. The

Supplementary Material (ESI) for Chemical Communications

This journal is (c) The Royal Society of Chemistry 2006

filtrate was collected under nitrogen, and the filtrate residue washed with toluene (2 x 20 mL). The solvent from the combined filtrate and washing was removed under vacuum to give a white solid. Toluene (2 x 20 mL) was added to this solid and then removed under vacuum to ensure the full removal of PCl<sub>3</sub> to give **7** as a white solid (8.70 g, 91 %) and used without further purification. <sup>1</sup>H NMR (300 MHz; CDCl<sub>3</sub>): 1.30 (18H, s, <sup>t</sup>Bu), 7.31 (1H, s, ArH), 7.79 (1H, s, ArH); <sup>31</sup>P NMR (121 MHz; CDCl<sub>3</sub>): 183.6 (s).

**Synthesis of Ligand 4c.** A mixture of NEt<sub>3</sub> (6.0 mL, 43.0 mmol) and **7** (2.00 g, 4.72 mmol) in toluene (60 mL) at -40 °C was treated drop-wise with (2R,3R)-(-)-2,3-butanediol (0.86 mL, 9.42 mmol) in toluene (20 mL). The mixture was allowed to warm to room temperature overnight, then filtered and the filtrate residue washed with toluene (2 x 20 mL). The solvent from the filtrate was removed under vacuum to give **4c** as a white solid. (3.10 g, 72.5 %). <sup>1</sup>H NMR (300 MHz; CDCl<sub>3</sub>): 1.28 (18H, s, <sup>t</sup>Bu), 1.32 (6H, d, *J* = 9 Hz, CH<sub>3</sub>), 1.40 (6H, d, *J* = 5 Hz, CH<sub>3</sub>), 3.80 (2H, dq, *J* = 6 & 5 Hz, OCH), 4.17 (2H, dq, *J* = 9 & 6 Hz, OCH), 6.79 (1H, s, ArH), 7.18 (1H, s, ArH); <sup>31</sup>P NMR (121 MHz; CDCl<sub>3</sub>): 135.4 (s); <sup>13</sup>C NMR (75 MHz; CDCl<sub>3</sub>) 18.45, 19.60 (s, CH<sub>3</sub>), 30.55 (s, CH<sub>3</sub> <sup>t</sup>Bu), 34.92 (s, C <sup>t</sup>Bu), 78.47, 81.13 (s, OCH), 112.52 (t, *J* = 16 Hz, CH), 125.92, 134.43, 149.47.

**Synthesis of ligand 4d.** A mixture of NEt<sub>3</sub> (3.0 mL, 21.5 mmol) and **7** (1.00 g, 2.36 mmol) in toluene (60 mL) at -40 °C was treated drop-wise with (D)-mannitoldiol (1.24 g, 4.72 mmol) in toluene (20 mL). The mixture was allowed to warm to room temperature overnight, then filtered and the filtrate residue washed with toluene (2 x 20 mL). The solvent from the solution was removed under vacuum to give **4d** as a very hygroscopic white solid (2.61 g, 69 %). <sup>1</sup>H NMR (300 MHz; CDCl<sub>3</sub>): 1.25 (6H, s, CH<sub>3</sub>), 1.26 (18H, s, <sup>t</sup>Bu), 1.33 (6H, s, CH<sub>3</sub>), 1.39 (6H, s, CH<sub>3</sub>), 1.42 (6H, s, CH<sub>3</sub>), 3.98-4.19 (12H, m, OCH & OCH<sub>2</sub>), 4.19-4.27 (2H, m, OCH), 4.47-4.50 (2H, m, OCH), 6.56 (1H, s, ArH), 7.21 (1H, s, ArH); <sup>31</sup>P NMR (121 MHz; CDCl<sub>3</sub>): 136.7 (s); <sup>13</sup>C NMR (75 MHz; CDCl<sub>3</sub>): 25.36, 25.68, 26.89, 27.22 (s, CH<sub>3</sub>), 30.09 (s, CH<sub>3</sub> <sup>t</sup>Bu), 34.93 (s, C <sup>t</sup>Bu), 66.18 (s, C(Me)<sub>2</sub>), 66.58, 67.17 (s, CH<sub>2</sub>), 67.69 (s, C(Me)<sub>2</sub>), 76.38, 76.89, 80.13, 81.37 (s, OCH), 110.49, 113.11 (t, *J* = 15 Hz, Ar CH), 129.44, 135.50.

**Synthesis of complex 5a. Method A.** A mixture of ligand **4a** (0.30 g, 0.4 mmol) and  $[\text{PdCl}_2(\text{NCPH})_2]$  (0.15 g, 0.4 mmol) in 1,2-dichloroethane (20 mL) was heated to reflux during which time a white suspension was formed. The mixture was maintained at reflux until a clear yellow solution was obtained (approx. 6 days). The solvent was removed under vacuum, the residue was re-dissolved in THF and filtered through celite. The solvent was removed under vacuum and trituration with pentane to give **5a** as a pale yellow powder (0.27 g, 77.5 %). Crystals suitable for X-ray analysis were grown from  $\text{CDCl}_3$ .  $^1\text{H}$  NMR (300 MHz;  $\text{CDCl}_3$ ): 6.80 (2H, d,  $J = 8$  Hz, ArH), 7.21-7.68 (9H, m, ArH), 7.87-8.08 (16H, m, ArH);  $^{31}\text{P}$  NMR ( $\text{CDCl}_3$ ): 147.2 (s); MS (EI):  $m/z = 878$  ( $\text{M}^+$ ), 843 ( $\text{M}^+ - \text{Cl}$ ), 738 ( $\text{M}^+ - \text{PdCl}$ ).

**Method B.** Ligand **4a** (0.404 g, 0.547 mmol),  $[\text{PdCl}_2(\text{NCMe})_2]$  (0.142g, 0.546 mmol) and 1,2-dichloroethane (2.5 mL) were placed in microwave reaction vessel and heated in a CEM Discover 300 W microwave reactor at 150 °C for 1h. Work-up as method A (91.5 %).

**General method for the synthesis of complexes 5b - d:** A mixture of the appropriate ligand **4** (0.08 mmol) and  $[\text{PdCl}_2(\text{NCMe})_2]$  (0.021 g, 0.08 mmol) in 1,2-dichloroethane (2 mL) was treated with  $\text{NEt}_3$  (0.011 mL, 0.08 mmol) and then heated at 80 °C for 2h. The resultant mixture was filtered through celite, the solvent was removed under vacuum and the residue crystallised from  $\text{CH}_2\text{Cl}_2/\text{Et}_2\text{O}$

**Complex 5b:** Grey solid (0.041 g, 51 %).  $^1\text{H}$  NMR (300 MHz;  $\text{CDCl}_3$ ): 1.17 (18H, s,  $^t\text{Bu}$ ), 7.24 (1H, s, ArH), 7.27 (2H, ddd,  $J = 8, 7$  & 1 Hz, ArH), 7.34 (2H, d,  $J = 9$  Hz, ArH), 7.35 (2H, ddd,  $J = 8, 7$  & 1 Hz, ArH), 7.44 (2H, ddd,  $J = 8, 7$  & 1 Hz, ArH), 7.46 (2H, d,  $J = 9$  Hz, ArH), 7.48 (2H, d,  $J = 9$  Hz, ArH), 7.53 (2H, ddd,  $J = 8, 7$  & 1 Hz, ArH), 7.64 (2H, d,  $J = 9$  Hz, ArH), 7.88 (2H, d,  $J = 8$  Hz, ArH), 7.95 (2H, d,  $J = 9$  Hz, ArH), 8.00 (2H, d,  $J = 8$  Hz, ArH), 8.02 (2H, d,  $J = 9$  Hz, ArH);  $^{31}\text{P}$  NMR (121 MHz;  $\text{CDCl}_3$ ): 147.3 (s); Anal. calcd for  $\text{C}_{54}\text{H}_{43}\text{ClO}_6\text{P}_2\text{Pd}\cdot\text{CDCl}_3$ : C, 59.40; H, 4.08. Found: C, 59.55; H, 3.85.

**Complex 5c:** Grey solid (0.021 g, 47.5 %);  $^1\text{H}$  NMR (300 MHz;  $\text{CDCl}_3$ ): 1.24 (18H, br s,  $^t\text{Bu}$ ), 1.48 (12H, br s,  $\text{CH}_3$ ), 4.32 (4H, br s, CH), 7.02 (1H, s, ArH);  $^{31}\text{P}$  NMR (121 MHz;  $\text{CDCl}_3$ ): 147.6 (s);  $^{13}\text{C}$  NMR (75 MHz;  $\text{CDCl}_3$ ): 18.78, 19.18 (s,  $\text{CH}_3$ ), 30.19 (s,  $\text{CH}_3$   $^t\text{Bu}$ ), 35.15 (s, C  $^t\text{Bu}$ ), 81.49, 82.89 (s, OCH), 125.23, 130.01, 146.51, 151.90.

**Complex 5d:** Grey solid (0.052 g, 68.5 %);  $^1\text{H}$  NMR (300 MHz;  $\text{CDCl}_3$ ): 1.24 (18H, s,  $^t\text{Bu}$ ), 1.30 (6H, s,  $\text{CH}_3$ ), 1.34 (6H, s,  $\text{CH}_3$ ), 1.39 (6H, s,  $\text{CH}_3$ ), 1.41 (6H, s,  $\text{CH}_3$ ), 3.92-3.96 (2H, m, OCH), 4.02-4.09 (4H, m, OCH), 4.13-4.18 (2H, m, OCH), 4.29-4.32 (2H, m, OCH), 4.43-4.46 (2H, m, OCH), 4.52-4.58 (4H, m, OCH), 7.04 (1H, s, ArH);  $^{31}\text{P}$  NMR (121 MHz;  $\text{CDCl}_3$ ): 151.2 (s);  $^{13}\text{C}$  NMR (75 MHz;  $\text{CDCl}_3$ ): 25.23, 25.36, 27.17, 27.43 (s,  $\text{CH}_3$ ), 30.06 (s,  $\text{CH}_3$   $^t\text{Bu}$ ), 35.08 (s, C  $^t\text{Bu}$ ), 66.45 (s,  $\text{C}(\text{Me})_2$ ), 66.66, 66.92 (s,  $\text{CH}_2$ ), 67.16 (s,  $\text{C}(\text{Me})_2$ ), 74.81, 74.94, 80.96, 81.42 (s, OCH), 125.51, 130.60, 146.75, 151.04; Anal. calcd for  $\text{C}_{38}\text{H}_{59}\text{ClO}_{14}\text{P}_2\text{Pd}$ : C, 48.36; H, 6.30. Found: C, 48.13; H, 6.61.

**Synthesis of complex 8.** Ligand **5b** (0.504 g, 0.592 mmol) and  $[\text{PdCl}_2(\text{NCMe})_2]$  (0.154 g, 0.592 mmol) were dissolved in  $\text{CH}_2\text{Cl}_2$  (10 mL) and stirred at room temperature for 1 h. The solution was concentrated under reduced pressure and ethanol (20 mL) added. The  $\text{CH}_2\text{Cl}_2$  was removed under reduced pressure to induce precipitation of the product. The yellow crystalline solid was isolated by filtration and dried *in vacuo* to give **8** as a orange solid. (0.57 g, 93.5 %). Crystals suitable for X-ray analysis were grown from  $\text{CH}_2\text{Cl}_2$ :MeOH.  $^1\text{H}$  NMR ( $\text{CDCl}_3$ ; 300 MHz): 0.28 (s, 18H,  $^t\text{Bu}$ ), 1.23 (s, 18H,  $^t\text{Bu}$ ), 6.01 (d, 2H,  $J = 9$  Hz, Ar-H), 7.03-7.12 (m, 12H, Ar-H), 7.24-7.38 (m, 8H, Ar-H), 7.43 (d, 2H,  $J = 6$  Hz, Ar-H), 7.51 (d, 4H,  $J = 6$  Hz, Ar-H), 7.52 (d, 2H,  $J = 6$  Hz, Ar-H), 7.69 (d, 2H,  $J = 7$  Hz, Ar-H), 7.73 (dd, 4H,  $J = 3$  & 9 Hz, Ar-H), 7.79 (d, 2H,  $J = 9$  Hz, Ar-H), 7.95 (d, 4H,  $J = 9$  Hz, Ar-H), 8.13 (d, 2H,  $J = 6$  Hz, Ar-H), 8.22 (d, 2H,  $J = 6$  Hz, Ar-H), 8.38 (s, 4H, Ar-H), 8.44 (br s, 2H, Ar-H).  $^{31}\text{P}$  NMR ( $\text{CDCl}_3$ ; 121.5 MHz): 102.29 (d,  $^2J_{\text{PP}} = 46.2$  Hz), 104.28 (d,  $^2J_{\text{PP}} = 46.2$  Hz).  $^{13}\text{C}$  NMR ( $\text{CDCl}_3$ ; 75.5 MHz): 28.61, 30.64 (s,  $\text{CH}_3$   $^t\text{Bu}$ ), 34.82, 35.27 (s, C  $^t\text{Bu}$ ), 111.59, 120.03, 122.09, 122.34, 124.08, 125.46, 126.01, 126.62 (d,  $J_{\text{CP}} = 10$  Hz), 126.89, 127.15, 127.40, 127.71, 128.40 (d,  $J_{\text{CP}} = 11$  Hz), 128.79,

129.21, 130.24, 131.60, 132.47, 132.44, 132.80, 133.14. Anal. calcd for  $C_{108}H_{88}Cl_4O_{12}P_4Pd_2 \cdot (CH_2Cl_2)_{1.5}$ : C, 60.26; H, 4.20. Found: C, 60.19; H, 4.64.

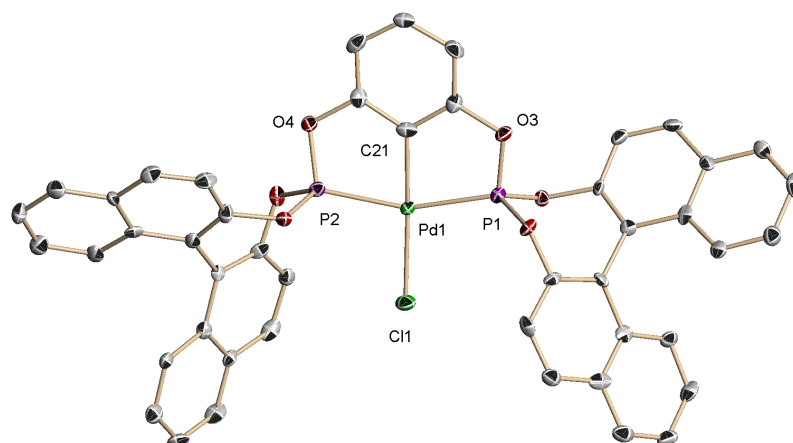

**Figure S1.** Molecular structure of complex **5a**. Selected bond lengths (Å) and angles (°): **5a**. Pd1-P1, 2.2615(19); Pd1-Pd2, 2.2445(18); Pd1-C21, 1.969(6); Pd1-Cl1, 2.3486(18); P1-O1, 1.613(5); P1-O2, 1.586(5); P1-O3, 1.597(5); P2-O4, 1.612(5); P2-O5, 1.587(5); P2-O6, 1.595(5); P1-Pd1-Cl1, 101.66(7); P2-Pd1-Cl1, 99.44(7); P2-Pd1-P1, 158.13(7); C21-Pd1-Cl1, 175.7(2); C21-Pd1-P1, 79.6(2); C21-Pd1-P2, 78.9(2); O2-P1-O1, 103.3(3);

Supplementary Material (ESI) for Chemical Communications

This journal is (c) The Royal Society of Chemistry 2006

O2-P1-O3, 105.3(3); O3-P1-O1, 97.8(3); O5-P2-O4, 97.9(3); O5-P2-O6, 103.0(2); O6-P2-O4, 106.6(3).
